# Supplementary material for: Differences in Gene Expression between Mouse and Human for Dynamically Regulated Genes in Early Embryo
Source: PubMed Central journal article supplement (PMC4121084; doi:10.1371/journal.pone.0102949), 2014-08-04

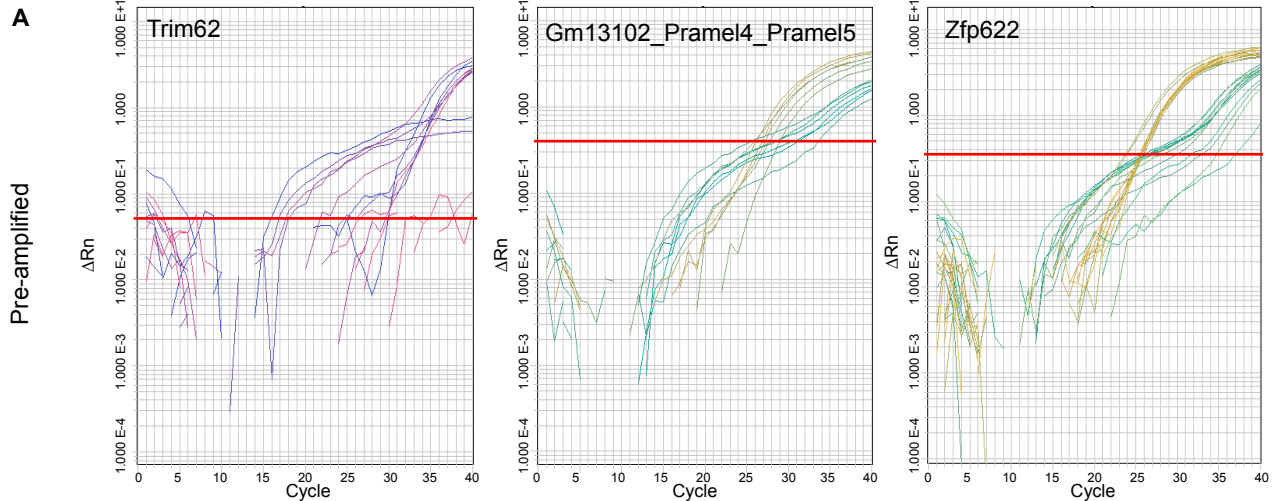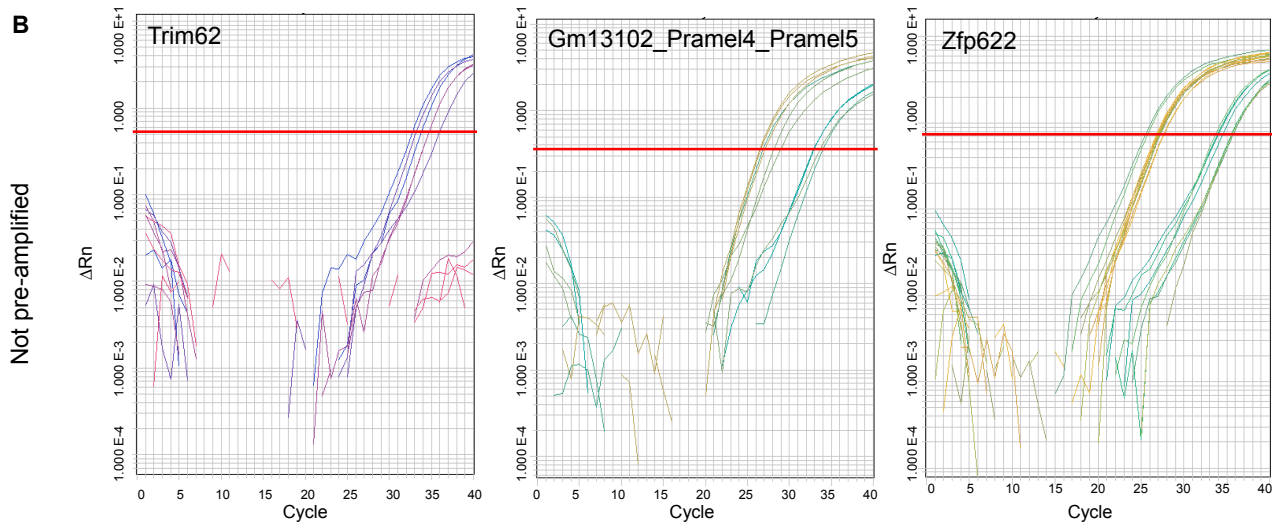

Supplement: pone.0102949.s001.pdf [file pone.0102949.s001.pdf]
